## **Comparison of Macular Thickness Measurements Using Swept-Source and Spectral-Domain Optical Coherence Tomography in Healthy and Diabetic Subjects**

### **Authors:**

Kun Xiong, MD<sup>1</sup>, Wei Wang, MD, PhD<sup>1</sup>, Xia Gong, MD<sup>1</sup>, Wangting Li, MD<sup>1</sup>, Yuting Li, MD, MPH<sup>1</sup>, Jie Meng, MD<sup>1</sup>, Langhua Wang, MD, PhD<sup>1</sup>, Xiaoling Liang, MD, PhD<sup>1</sup>, Yizhi Liu, MD, PhD<sup>1</sup>, Wenyong Huang, MD, PhD<sup>1</sup>

### **Affiliation and institute:**

1. Zhongshan Ophthalmic Center, State Key Laboratory of Ophthalmology, Sun Yat-sen University, Guangzhou, People's Republic of China

### **Corresponding author:**

Wenyong Huang, MD&PhD

Professor of Ophthalmology, Vice director of Department of Preventive Ophthalmology, Zhongshan Ophthalmic Center, State Key Laboratory of Ophthalmology, Sun Yat-sen University

54S.Xianlie Road, Guangzhou, China 510060

Email: andyhwyz@aliyun.com; huangwenyong@gzzoc.com

**Word count:** 2641

**Tables:** 4

**Figures:** 4

### **Synopsis**

This cross-sectional study aimed to establish normative data for macular thickness using SS-OCT, and revealed significant differences in measurements between SS-OCT and SD-OCT, we derived an equation to convert SS-OCT measurements to SD-OCT equivalents.

## **Abstract**

**Purpose:** To compare macular thicknesses measured using swept-source optical coherence tomography (SS-OCT) and spectral domain OCT (SD-OCT) in normal subjects, diabetics with diabetic retinopathy (DR) and diabetics without DR (NDR).

**Methods:** We analysed 510 normal eyes, 741 NDR eyes and 209 DR eyes. Mean macular thicknesses in Early Treatment Diabetic Retinopathy Study (ETDRS) subfields, central point thicknesses (CPT), and macular volume were measured by SS-OCT and SD-OCT. We assessed agreement between SS-OCT and SD-OCT measurements by intraclass correlation coefficients (ICC) and Bland-Altman plots, and established a conversion equation relating central subfield (CSF), CPT and macular volume between the two devices.

**Results:** Macular thickness measurements by SS-OCT were significantly thinner than those by SD-OCT. The mean CSF thickness in normal eyes measured by SD-OCT and SS-OCT were  $226.6 \pm 19.1 \mu\text{m}$  (male  $236.1 \pm 19.1 \mu\text{m}$  vs female  $223.0 \pm 17.9 \mu\text{m}$ ,  $p < 0.0001$ ) and  $258.4 \pm 19.8 \mu\text{m}$ . In all three groups, the agreement between SS-OCT and SD-OCT was excellent ( all  $\text{ICC} \geq 0.866$ ). For CSF the conversion equation  $\text{SD-OCT} = 31.95 + 0.999 \times \text{SS-OCT}$  was derived. Using the equation ,with 99.6% and 97.6% of the predicted values for CSF fell within 10% of the actual measurements in DR and NDR eyes, respectively.

**Conclusion:** We propose SS-OCT CSF thicknesses of  $275 \mu\text{m}$  for males and  $260 \mu\text{m}$  for females as the minimum criteria for macular edema in Chinese eyes. And SS-OCT measurements were significantly thinner than those of SD-OCT, we derived an equation to convert SS-OCT measurements to SD-OCT equivalents.

**Keywords:** swept-source optical coherence tomography; spectral domain optical coherence tomography; macular thickness; macular edema; conversion equation

## INTRODUCTION

Since its emergence in the 1990s,<sup>1</sup> optical coherence tomography (OCT) has provided a non-invasive method for quantitative measurements retinal thickness and has become an important imaging technique for the evaluation and management of macular diseases. Macular thickness is one of the diagnostic criteria for macular diseases and central subfield (CSF) thickness measured using OCT are the most commonly used inclusion and retreatment criteria in clinical trials, such as diabetic macular edema (DME), age-related macular degeneration (AMD) and central retinal vein occlusion (CRVO).<sup>2-5</sup> Spectral-domain OCT (SD-OCT), also known as Fourierdomain OCT, is currently the most widely used OCT technology, with fast scanning speed, short acquisition time and high-resolution to obtain retinal thickness.

Swept-source OCT (SS-OCT) is a new generation of OCT and has been introduced into clinical practice in recent years. This technology differs from conventional SD-OCT in that it, uses a light source with longer tunable wavelengths, has a more rapid scanning,<sup>6,7</sup> can penetrate deeper into ocular tissue, with little loss of signal, and allows for more detailed visualisation of retinal and choroidal structures.<sup>8,9</sup>

In order to avoid misdiagnosis of macular disease in clinical work, ophthalmologist need to focus on the differences in macular thickness measured by various OCT devices. Some studies have compared macular thickness between the two methods and noted that the macular thickness measurements from SS-OCT were significantly thinner than those from SD-OCT,<sup>25,26</sup> which is due to the variation of the OCT segmentation algorithms that result in differences in the location of retinal inner boundary segmentation.<sup>10-12</sup> SS-OCT as a relatively new imaging technique, normative database on macular thickness have not been established. It is thus important to compare these data with the commonly used SD-OCT data.

The purpose of the present study was to establish the normative data for macular thickness in Chinese eyes using the SS-OCT. Furthermore, we compared the macular thickness measurements from SS-OCT and SD-OCT, and sought to derive an equation to convert SS-OCT measurements to SD-OCT equivalents and evaluate the accuracy of the equation in the eyes of diabetics with diabetic retinopathy (DR) and those of diabetics without DR (NDR).

## **METHODS**

### **Subjects**

This prospective cross-sectional study was performed in the Zhongshan Ophthalmic Centre, which is affiliated with Sun Yat-sen University, Guangzhou, China. Subjects enrolled in the study between June 10, 2019 and December 22, 2019. All research conducted adhered to the tenets of the Declaration of Helsinki, and written informed consent was obtained from all subjects.

The inclusion criteria for normal subjects were as follows: best-corrected visual acuity of 20/20 or higher, intraocular pressure less than 21 mmHg, spherical refraction within  $\pm 6.0$  dioptres (D), cylinder degree within  $\pm 3.0$  D, normal fundus, and no history or evidence of diabetes, retinal disease, glaucoma, intraocular surgery or ocular laser treatment.

The inclusion criteria for diabetic patients were as follows: age of at least 30 years with type 2 diabetes, using standard seven-field Early Treatment Diabetic Retinopathy Study (ETDRS) photographs, the severity of diabetic retinopathy was assessed by an expert ophthalmologist (WW) according to the International Clinical Diabetic Retinopathy Disease Severity Scale,<sup>13</sup> intraocular pressure less than 21 mmHg, spherical refraction within  $\pm 6.0$ D, cylinder degree within  $\pm 3.0$ D, no history of glaucoma, no retinal disease other than DR (such as epiretinal membrane, AMD, CRVO) and no history of previous intraocular treatment, including intravitreal

injections, retinal laser procedures and intraocular surgery.

All subjects in this study underwent complete ophthalmologic examination, including assessments of best-corrected visual acuity, intraocular pressure (IOP), refractive errors, slit-lamp biomicroscopy, fundus photography, axial length measurement (Lenstar LS900 Haag-Streit AG, Koeniz, Switzerland), SS-OCT and SD-OCT imaging, as well as a complete medical history.

### **SS-OCT and SD-OCT imaging**

All subjects underwent sequential scans with both SS-OCT and SD-OCT devices in the same clinical setting. The two OCT examinations were performed by the same experienced technician in the order of SD-OCT and SS-OCT, with each subject undergoing the second scan immediately after the first scan. SS-OCT (Triton DRI OCT, Topcon, Tokyo, Japan) uses a tunable laser as a light source to provide a 1050 nm centered wavelength, reaching a scanning speed of 100,000 A-scans per second and yielding 8  $\mu\text{m}$  of axial and 20  $\mu\text{m}$  of transverse resolution in tissues. A three-dimensional horizontal scan (7.0 mm  $\times$  7.0 mm, 512  $\times$  256) protocol was adopted with centring on the fovea. SD-OCT (Spectralis OCT; Heidelberg Engineering, Heidelberg, Germany) use a super luminescence diode at the 870 nm wavelength as a light source; it provided 5-6  $\mu\text{m}$  of axial resolution and 20  $\mu\text{m}$  of transverse resolution with maximum scan speed of 40,000 A-scans per second. A 31 horizontal-line raster scan (30°  $\times$  25°, 20 mm  $\times$  20 mm) centred on the fovea was performed.

Images were excluded from analyses if the image quality score was below 15 dB for SD-OCT and below 45 for SS-OCT.<sup>14,15</sup> Image quality scores were automatically generated by the software built into the OCT device. If images were decentration, they were also excluded during the image review process.

Retinal boundaries were automatically segmented by specialised image-viewing software from their respective OCT machines (Figure 1) and reviewed by trained retinal specialists (WW). In this study, segmentation errors of the eye were excluded. The mean macular thickness, central point thickness (CPT) and macular volume were automatically generated by the image-viewing software (Triton DRI OCT version 1.6.2.4, Heidelberg Eye Explorer version 6.0.9.0) in the ETDRS grid.

### **Statistical analysis**

Only data from the right eyes of subjects were included in the statistical analysis. Data are presented as mean values  $\pm$  standard deviations (SDs). Paired t-tests were used to compare macular thicknesses between SS-OCT and SD-OCT. Pearson correlation coefficients and intraclass correlation coefficients (ICC) were calculated to compare the correlation and agreement between the two OCT devices. The ICC was used to determine the agreement of two devices using a two-way random-effects model. The degree of reliability was classified into one the following five categories based on the ICC value: slight (0-0.2), fair (0.21-0.4), moderate (0.41-0.6), substantial (0.61-0.8), and almost perfect (0.81-1.0).<sup>16</sup> The agreement between the two OCT devices was represented visually in Bland-Altman plots.

Conversion equation between SS-OCT and SD-OCT values was established according to the measurements of normal subjects. The conversion equation was derived from linear relationships of CSF, CPT and macular volume. The SD-OCT values in diabetic patients were predicted using the conversion equation based on the SS-OCT measurements and compared with the actual SD-OCT values. Bland-Altman plots were used to analyse the level of agreement between the predicted SD-OCT values and actual SD-OCT measurements. Statistical analyses were performed using SPSS version 25.0 (SPSS, Armonk, NY) and MedCalc version 16.8.4 (MedCalc Software bvba, Ostend, Belgium). A p-value less than 0.05 was considered to be statistically significant.

## **RESULTS**

### **Demographics**

A total of 1460 eyes from 1460 subjects were included in the study: 741 NDR eyes (mean age:  $64.6 \pm 7.6$  years), 209 DR eyes (mean age:  $64.3 \pm 8.0$  years), and 510 healthy eyes (mean age:  $54.9 \pm 9.1$  years). There were significant differences in age, sex, spherical equivalent, and IOP among the three groups, but there were no significant differences in axial length. The study demographics and clinical characteristics are summarised in Table 1.

### **Thickness comparison between SS-OCT and SD-OCT**

The mean macular thicknesses in nine ETDRS subfields, CPT and macular volume measured by SS-OCT and SD-OCT are shown in Table 2, Figure 2. There was significant differences in macular thickness measurements between SS-OCT and SD-OCT. The mean CSF thicknesses in normal eyes measured by SS-OCT and SD-OCT were  $226.6 \pm 19.1$   $\mu\text{m}$  and  $258.4 \pm 19.8$   $\mu\text{m}$  ( $p < 0.0001$ ), respectively. There was a difference between genders, with mean SS-OCT CSF thickness being  $236.1 \pm 19.1$   $\mu\text{m}$  for males and  $223.0 \pm 17.9$   $\mu\text{m}$  for females ( $p < 0.0001$ ); this difference was also seen for SD-OCT ( $267.6 \pm 19.8$   $\mu\text{m}$  for males and  $254.9 \pm 18.6$   $\mu\text{m}$  for females,  $p < 0.0001$ ). The mean differences in CSF thickness in NDR eyes and DR eyes were  $32.1\mu\text{m}$  and  $33.5$   $\mu\text{m}$  comparing SS-OCT and SD-OCT, respectively.

### **Correlation and agreement between SS-OCT and SD-OCT**

SS-OCT and SD-OCT macular thicknesses were highly correlated (Table 3). The Pearson correlation coefficients for macular thickness in nine ETDRS subfields, CPT and macular volume were greater than 0.868 for all three groups of subjects. Likewise, all ICC values exceeded 0.866 (Table 3) and were classified as almost perfect (ICC = 0.81-1.0) for SS-OCT and SD-OCT, indicating the excellent degree of agreement of the measurements between the two OCT devices. The Bland-Altman plots shown in

Figure 3 demonstrates good comparability of CSF thickness, CPT and macular volume measurements between SS-OCT and SD-OCT, with most of the values being within the limits of agreement.

### **Conversion equation**

The conversion equation was derived from measurements of normal eyes. The conversion equations for SS-OCT to SD-OCT are as follows: CSF SD-OCT =  $31.95 + 0.999 \times \text{SS-OCT}$ , CPT SD-OCT =  $36.55 + 0.988 \times \text{SS-OCT}$ , and macular volume SD-OCT =  $0.84 + 0.993 \times \text{SS-OCT}$ . The predicted SD-OCT values in NDR and DR eyes were compared with actual SD-OCT measurements (Table 4) with 99.6% and 97.6% of the predicted values for CSF falling within 10% of the actual measurements, and 98.5% and 95.2% of the predicted values for CSF falling within 5% of the actual measurements. The Bland-Altman plots in Figure 4 describes the level of agreement between predicted value and actual SD-OCT measurements.

### **DISCUSSION**

We evaluated macular thickness measurements from SS-OCT and SD-OCT devices in normal subjects, NDR patients and DR patients. The results revealed significant differences in macular thickness measurements between two OCT devices. The macular thicknesses measured using SS-OCT were significantly thinner in nine ETDRS subfields compared to those measured using commonly used SD-OCT. In addition, there was no difference in mean CSF thicknesses between normal eyes and NDR eyes, which was in parallel with previous studies.<sup>17</sup>

Central macular thickness is a common inclusion and retreatment criterion for macular pathology in clinical practice, such as DME, AMD and CRVO.<sup>2-5</sup> Because the measured CSF thickness varies by the OCT technique used, the CSF thickness criterion for the diagnosis of macular disease also varies by OCT technique. For example, the CSF thicknesses cutoff point for Stratus and Spectral OCT diagnostic



DME are 250  $\mu\text{m}$  and 315  $\mu\text{m}$ , respectively.<sup>18, 19</sup> As SD-OCT has been the most common commercially available OCT device over the past decade, most trials were designed based on the macular thickness measurements obtained from SD-OCT devices. We noted that our SS-OCT measurements were smaller than those of the SD-OCT, which may be due to differences in that segmentation of the inner retinal boundary resulting from the different segmentation software in each OCT device.<sup>10-12</sup> Specifically, the inner boundary for SD-OCT is located at the retinal pigment epithelium (RPE)-Bruch's membrane complex, whereas the inner boundary for SS-OCT is located at the upper border of the RPE (Figure 1).

Standardised reference values are essential for the diagnosis for macular edema. Our study showed that there were significant gender differences in CSF thickness as has been previously reported,<sup>20, 21</sup> with the mean SS-OCT CSF thicknesses being  $236.1 \pm 19.1 \mu\text{m}$  and  $223.0 \pm 17.9 \mu\text{m}$  in healthy males and females, respectively. The diabetic retinopathy studies have defined a CSF of 250  $\mu\text{m}$  as the upper limit of normal macular thickness using the Stratus OCT and this was calculated based on 2 SDs above the mean CSF.<sup>18</sup> Similarly, in the study we propose CSF thicknesses of 275  $\mu\text{m}$  for males and 260  $\mu\text{m}$  for females as cut-off values for the presence of macular edema using SS-OCT in the Chinese population.

Although there are variations in the macular thickness values measured by different OCT devices, several earlier studies have investigated the agreement of macular thickness measurements between different OCT devices and shown that inter-device reproducibility was excellent.<sup>22, 23</sup> However, fewer studies have compared SS-OCT and SD-OCT devices for the measurement of macular thickness. Tan et al.<sup>24</sup> compared DRI-OCT-1 and Spectralis OCT in measuring the macular thicknesses of healthy eyes and eyes with high myopia; they found that the mean difference in CSF thickness was 33.1  $\mu\text{m}$  and that the ICC value and Bland - Altman plots demonstrated excellent agreement between the two OCT devices. This result is similar to that of our study, in

which the mean differences in CSF thickness measured using SS-OCT and SD-OCT in healthy subjects, NDR patients and DR patients were 31.8  $\mu\text{m}$ , 32.1  $\mu\text{m}$  and 33.5  $\mu\text{m}$ , respectively. The Bland-Altman plots showed that most values were distributed close to the mean difference and were within the limits of agreement, which included 95% of the differences between measurements generated by the two devices. The Pearson correlation coefficient and ICC also indicated high correlation and excellent agreement in all sectors. However, Hanumunthad et al.<sup>25</sup> reported that the mean DRI-OCT-1 CSF thickness in patients with AMD was 67.9  $\mu\text{m}$  thinner than that obtained by Spectralis OCT, and that the Bland-Altman plot of the study showed low agreement in the macular thicknesses reported by the two OCT devices. The mean difference in CSF thickness was greater in patients with AMD, this may be attributed to the increased retinal thickness measured by SD-OCT, which may include drusen and other sub-RPE deposits.<sup>26</sup>

There are significant differences in macular thicknesses measured by different OCT methods, which introduces significant inconvenience to clinical work. Therefore, we have proposed to establish conversion equation between both types of OCT. Some studies have established equations to convert Stratus OCT CSF values to corresponding Cirrus, Spectralis, or RTVue OCT values,<sup>27-29</sup> and noted relatively small differences between the predicted value and the actual measurements, indicating that the conversion equations were satisfactory. The Diabetic Retinopathy Clinical Research Network (DRCR.net) accepts up to a 20% change in CSF between two different OCT devices (after using the conversion equation) account for machine measurement errors and variations introduced by instrument alteration.<sup>30</sup> In this study, we derived the conversion equation of SS-OCT to SD-OCT using measurements from normal eyes, using the conversion equation, with 99.6% and 97.6% of the predicted values for CSF fell within 10% of the actual measurements in DR and NDR eyes. Therefore, our equation can accurately predict the corresponding value of SD-OCT by using the SS-OCT measurements.

The strengths of this study include a larger sample size than those of previous studies, and the inclusion of only one eye per participant to rule out binocular interaction, which increased the reliability of the results. Additionally, this study made comparisons of macular thickness in all ETDRS subfields, CPT and macular volume using two commonly used OCT devices, not just the central subfield. Lastly, all OCT scans were obtained using standardised imaging protocols, and the two OCT scans were performed continuously to avoid the potential effects of diurnal variations.<sup>31</sup>

This study also has several limitations. First, in this study, SS-OCT and SD-OCT measurements were compared for the first time in Chinese eyes, and SS-OCT measurements of retinal thickness in normal eyes was reported, but it is known that macular thickness varies among ethnicities, with Asians and Blacks having thinner maculas compared to Whites.<sup>32</sup> Therefore, more studies involving subjects of different ethnicities are needed to reach generalisable conclusions. Additionally, the difference in macular thickness measured by two OCT devices vary by the type of retinal disease.<sup>26</sup> In other words, our equation can accurately predict SD-OCT values for the eyes of diabetic patients, but may not be applicable to other retinal diseases.

In conclusion, this study reports the differences in macular thicknesses measured by SS-OCT and SD-OCT in healthy subjects and diabetic patients with DR and without DR. We propose using SS-OCT CSF thicknesses of 275  $\mu\text{m}$  for males and 260  $\mu\text{m}$  for females as the minimum criteria for the presence of macular edema in Chinese eyes. Although the macular thickness measured by SS-OCT was significantly thinner than that of SD-OCT, there was high correlation and excellent agreement between the two OCT devices, which allowed a conversion equation to be established to compare the results of SS-OCT with those of SD-OCT.

**Author Contributions:** WH and WW had full access to all the data in the study and take responsibility for the integrity of the data and the accuracy of the data analysis.

*Study concept and design:* WH, WW, KX, XG, WL, YL.

*Acquisition, analysis, or interpretation of data:* KX, WW, XG, WL, JM, YL.

*Drafting of the manuscript:* KX, WW.

*Critical revision of the manuscript for important intellectual content:* all authors.

*Statistical analysis:* KX.

*Administrative, technical, or material support:* WW, KX.

*Study supervision:* WW.

**Conflict of Interest Disclosures:** All authors declare no conflicts of interest related to this study.

**Funding/Support:** This study was supported by the National Natural Science Foundation of China (81530028; 81721003), the Guangdong Province Science & Technology Plan (2014B020228002).

**Role of the Funder/Sponsor:** The funding organizations had no role in the design or conduct of the study; collection, management, analysis, and interpretation of the data; preparation, review, or approval of the manuscript; and decision to submit the manuscript for publication.

## References

1. Huang D, Swanson EA, Lin CP, et al. Optical coherence tomography. *Science* 1991;22;254:1178-81.
2. Jampol LM, Glassman AR, Liu D, et al. Plasma vascular endothelial growth factor concentrations after intravitreal anti-vascular endothelial growth factor therapy for diabetic macular edema. *Ophthalmology* 2018;125:1054-1063.
3. Do DV, Nguyen QD, Boyer D, et al. One-year outcomes of the da Vinci Study of VEGF Trap-Eye in eyes with diabetic macular edema. *Ophthalmology* 2012;119:1658-65.
4. Heier JS, Brown DM, Chong V, et al. Intravitreal aflibercept (VEGF trap-eye) in wet age-related macular degeneration. *Ophthalmology* 2012;119:2537-2548.
5. Hykin P, Prevost AT, Vasconcelos JC, et al. Clinical effectiveness of intravitreal therapy with ranibizumab vs aflibercept vs bevacizumab for macular edema secondary to central retinal vein occlusion: a randomized clinical trial. *JAMA Ophthalmol* 2019;137:1256–1264.
6. Mrejen S, Spaide RF. Optical coherence tomography: imaging of the choroid and beyond. *Surv Ophthalmol* 2013;58:387-429.
7. Potsaid B, Baumann B, Huang D, et al. Ultrahigh speed 1050nm swept source/Fourier domain OCT retinal and anterior segment imaging at 100,000 to 400,000 axial scans per second. *Opt Express* 2010;18:20029-48.
8. Mansouri K, Nuyen B, Weinreb RN. Improved visualization of deep ocular structures in glaucoma using high penetration optical coherence tomography. *Expert Rev Med Devices* 2013;10:621-8.
9. Barteselli G, Bartsch D, Weinreb, RN et al. Real-time full-depth visualization of posterior ocular structures: comparison between Full Depth Imaging Spectral Domain OCT and Swept Source OCT. *Retina* 2016; 36: 1153-1161.

10. Sull AC, Vuong LN, Price LL, et al. Comparison of spectral/Fourier domain optical coherence tomography instruments for assessment of normal macular thickness. *Retina* 2010;30:235-245.
11. Pierro L, Gagliardi M, Iuliano L, Ambrosi A, Bandello F. Retinal nerve fiber layer thickness reproducibility using seven different OCT instruments. *Invest Ophthalmol Vis Sci* 2012;53:5912-5920.
12. Smretschnig E, Krebs I, Moussa S, Ansari-Shahrezaei S, Binder S. Cirrus OCT versus SD-OCT: differences in segmentation in fibrovascular pigment epithelial detachment. *Graefes Arch Clin Exp Ophthalmol* 2010;248:1693-8.
13. Wilkinson CP, Ferris FL 3rd, Klein RE, et al. Proposed international clinical diabetic retinopathy and diabetic macular edema disease severity scales. *Ophthalmology*, vol 2003;110:1677–1682.
14. Leite MT, Rao HL, Zangwill LM, Weinreb RN, Medeiros FA. Comparison of the diagnostic accuracies of Spectralis, Cirrus and RTVue optical coherence tomography devices in glaucoma. *Ophthalmology* 2011;118:1334 –1339.
15. Mansouri K, Medeiros FA, Tatham AJ, Marchase N, Weinreb RN. Evaluation of Retinal and Choroidal Thickness by Swept-Source Optical Coherence Tomography: Repeatability and Assessment of Artifacts. *Am J Ophthalmol* 2014;157:1022-32.
16. Landis JR, Koch GG. The measurement of observer agreement for categorical data. *Biometrics* 1977;33:159-74.
17. Chalam KV, Bressler SB, Edwards AR, et al. Retinal thickness in people with diabetes and minimal or no diabetic retinopathy: Heidelberg Spectralis optical coherence tomography. *Invest Ophthalmol Vis Sci* 2012;53:8154-61.
18. Bressler NM, Edwards AR, Antoszyk AN, et al. Retinal thickness on stratus optical coherence tomography in people with diabetes and minimal or no diabetic retinopathy. *Am J Ophthalmol* 2008;145:894–901.

19. Grover S, Murthy RK, Brar VS, Chalam KV. Normative data for macular thickness by high-definition spectral-domain optical coherence tomography (Spectralis). *Am J Ophthalmol* 2009;148:266–271.
20. Kelty PJ, Payne JF, Trivedi RH, et al. Macular thickness assessment in healthy eyes based on ethnicity using Stratus OCT optical coherence tomography. *Invest Ophthalmol Vis Sci* 2008;49:2668-72.
21. Wagner-Schuman M, Dubis AM, Nordgren RN, et al. Race- and sex-related differences in retinal thickness and foveal pit morphology. *Invest Ophthalmol Vis Sci* 2011;52:625–634.
22. Liu X, Shen M, Huang S, et al. Repeatability and reproducibility of eight macular intra-retinal layer thicknesses determined by an automated segmentation algorithm using two SD-OCT instruments. *PLoS One* 2014;9:e87996.
23. Tepelus TC, Hariri AH, Balasubramanian S, Sadda SR. Reproducibility of macular thickness measurements in eyes affected by dry age-related macular degeneration from two different SD-OCT instruments. *Ophthalmic Surg Lasers Imaging Retina* 2018;49:410-415.
24. Tan CS, Chan JC, Cheong KX, et al. Comparison of retinal thicknesses measured using swept-source and spectral-domain optical coherence tomography devices. *Ophthalmic Surg Lasers Imaging Retina* 2015;46:172-9.
25. Hanumunthadu D, Ilginis T, Balaggan KS, Patel PJ. Agreement of swept-source and spectral-domain optical coherence-tomography retinal thickness measurements in neovascular age-related macular degeneration. *Clin Ophthalmol* 2017;29;11:2121-2123.
26. Han IC, Jaffe GJ. Comparison of spectral- and time-domain optical coherence tomography for retinal thickness measurements in healthy and diseased eyes. *Am J Ophthalmol* 2009;147:847-58,858.e1.
27. Abedi G, Patal P, Doros G, Subramanian ML. Transitioning from stratus OCT to cirrus OCT: a comparison and a proposed equation to convert central subfield macular thickness measurements in healthy subjects. *Graefes Arch Clin Exp*

*Ophthalmol* 2011;249:1353–1357.

28. Ibrahim MA, Sepah YJ, Symons RC, et al. Spectral- and time-domain optical coherence tomography measurements of macular thickness in normal eyes and in eyes with diabetic macular edema. *Eye (Lond)* 2012;26:454-62.
29. Bressler SB, Edwards AR, Andreoli CM, et al. Reproducibility of Optovue RTVue optical coherence tomography retinal thickness measurements and conversion to equivalent Zeiss stratus metrics in diabetic macular edema. *Transl Vis Sci Technol* 2015;4:5.
30. Diabetic Retinopathy Clinical Research Network, Bressler SB, Edwards AR, et al. Reproducibility of spectral-domain optical coherence tomography retinal thickness measurements and conversion to equivalent time-domain metrics in diabetic macular edema. *JAMA Ophthalmol* 2014;132:1113-1122.
31. Diabetic Retinopathy Clinical Research Network, Danis RP, Glassman AR, Aiello LP, et al. Diurnal variation in retinal thickening measurement by optical coherence tomography in center-involved diabetic macular edema. *Arch Ophthalmol* 2006;124:1701-7.
32. Guedes V, Schuman JS, Hertzmark E, et al. Optical coherence tomography measurement of macular and nerve fiber layer thickness in normal and glaucomatous human eyes. *Ophthalmology* 2003;110:177–189.



**Table 1.** Demographics and clinical characteristics of study patients.

|                          | <b>Normal</b> | <b>NDR</b>   | <b>DR</b>    | <b>p Value</b> |
|--------------------------|---------------|--------------|--------------|----------------|
| Gender (male/female)     | 138 / 372     | 299 / 442    | 96 / 113     | <0.0001        |
| Age (years)              | 54.9 ± 9.1    | 64.6 ± 7.6   | 64.3 ± 8.0   | <0.0001        |
| SE refraction (diopters) | 0.45 ± 1.96   | 0.96 ± 1.80  | 0.79 ± 1.84  | <0.0001        |
| Axial Length (mm)        | 23.52 ± 0.99  | 23.49 ± 0.96 | 23.36 ± 0.98 | 0.118          |
| IOP (mm Hg)              | 15.6 ± 2.1    | 16.1 ± 2.1   | 16.4 ± 2.4   | <0.0001        |

Data are expressed as number or mean ± standard deviation (SD).

SE = spherical equivalent; IOP = intraocular pressure.

**Table 2.** Comparison of macular thickness measurements between SS-OCT and SD-OCT

| <b>Location</b>  | <b>Group</b> | <b>SS-OCT</b> | <b>SD-OCT</b> | <b>Mean difference<br/>(95%CI)</b> | <b>P-value</b> |
|------------------|--------------|---------------|---------------|------------------------------------|----------------|
| Central subfield | Normal       | 226.6 ± 19.1  | 258.4 ± 19.8  | 31.8 (31.3 to 32.2)                | <0.0001        |
|                  | NDR          | 227.1 ± 19.8  | 259.1 ± 20.4  | 32.1 (31.7 to 32.4)                | <0.0001        |
|                  | DR           | 235.5 ± 51.9  | 269.0 ± 53.5  | 33.5 (31.8 to 35.2)                | <0.0001        |
| Inner temporal   | Normal       | 296.1 ± 14.1  | 327.2 ± 14.7  | 31.1 (30.8 to 31.4)                | <0.0001        |
|                  | NDR          | 292.4 ± 15.7  | 323.4 ± 16.3  | 31.0 (30.7 to 31.2)                | <0.0001        |
|                  | DR           | 297.4 ± 40.3  | 328.7 ± 40.2  | 31.3 (30.5 to 32.1)                | <0.0001        |
| Inner superior   | Normal       | 309.0 ± 14.5  | 340.2 ± 15.1  | 31.1 (30.8 to 31.5)                | <0.0001        |
|                  | NDR          | 304.1 ± 16.3  | 335.1 ± 17.0  | 31.0 (30.1 to 31.3)                | <0.0001        |
|                  | DR           | 306.5 ± 34.2  | 337.6 ± 34.4  | 31.1 (30.3 to 31.8)                | <0.0001        |
| Inner nasal      | Normal       | 307.3 ± 15.4  | 338.2 ± 16.0  | 30.9 (30.4 to 31.3)                | <0.0001        |
|                  | NDR          | 303.4 ± 17.1  | 335.0 ± 18.0  | 31.6 (31.1 to 32.0)                | <0.0001        |
|                  | DR           | 305.9 ± 31.4  | 337.3 ± 34.8  | 31.5 (30.5 to 32.5)                | <0.0001        |
| Inner inferior   | Normal       | 306.3 ± 14.5  | 335.5 ± 15.3  | 29.3 (28.9 to 29.6)                | <0.0001        |
|                  | NDR          | 301.4 ± 16.2  | 331.0 ± 17.1  | 29.5 (29.1 to 30.0)                | <0.0001        |
|                  | DR           | 304.6 ± 40.7  | 334.5 ± 43.0  | 29.9 (29.2 to 30.6)                | <0.0001        |
| Outer temporal   | Normal       | 257.2 ± 13.1  | 281.9 ± 13.4  | 24.7 (24.2 to 25.2)                | <0.0001        |
|                  | NDR          | 252.4 ± 13.8  | 277.5 ± 14.8  | 25.1 (24.6 to 25.6)                | <0.0001        |
|                  | DR           | 256.6 ± 30.4  | 281.7 ± 31.0  | 25.1 (24.3 to 25.9)                | <0.0001        |
| Outer superior   | Normal       | 273.7 ± 14.0  | 299.4 ± 14.0  | 25.7 (25.3 to 26.0)                | <0.0001        |
|                  | NDR          | 267.3 ± 14.7  | 293.4 ± 15.3  | 26.1 (25.7 to 26.5)                | <0.0001        |
|                  | DR           | 269.0 ± 25.5  | 295.3 ± 24.1  | 26.2 (25.2 to 27.3)                | <0.0001        |
| Outer nasal      | Normal       | 289.0 ± 15.0  | 317.6 ± 15.6  | 28.5 (28.2 to 28.9)                | <0.0001        |
|                  | NDR          | 282.4 ± 16.3  | 311.1 ± 17.0  | 28.7 (28.3 to 29.1)                | <0.0001        |
|                  | DR           | 282.9 ± 21.3  | 312.7 ± 22.4  | 29.8 (28.9 to 30.7)                | <0.0001        |
| Outer inferior   | Normal       | 259.7 ± 14.0  | 287.6 ± 14.4  | 27.9 (27.5 to 28.3)                | <0.0001        |

|               |        |              |              |                     |         |
|---------------|--------|--------------|--------------|---------------------|---------|
|               | NDR    | 253.6 ± 14.8 | 281.7 ± 15.0 | 28.2 (27.8 to 28.5) | <0.0001 |
|               | DR     | 255.3 ± 26.9 | 284.2 ± 27.4 | 28.8 (27.8 to 29.8) | <0.0001 |
| Central point | Normal | 185.9 ± 16.9 | 220.2 ± 18.1 | 34.2 (33.6 to 34.8) | <0.0001 |
|               | NDR    | 186.5 ± 17.9 | 221.1 ± 19.1 | 34.6 (34.1 to 35.2) | <0.0001 |
|               | DR     | 195.5 ± 54.0 | 232.3 ± 56.4 | 36.8 (34.7 to 38.9) | <0.0001 |
| Volume        | Normal | 7.82 ± 0.36  | 8.60 ± 0.36  | 0.78 (0.78 to 0.79) | <0.0001 |
|               | NDR    | 7.66 ± 0.39  | 8.45 ± 0.40  | 0.79 (0.78 to 0.80) | <0.0001 |
|               | DR     | 7.73 ± 0.73  | 8.53 ± 0.74  | 0.80 (0.78 to 0.82) | <0.0001 |

---

Data are expressed as mean ± SD.

**Table 3.** Correlation and agreement of macular thickness measurements for SS-OCT and SD-OCT

| <b>Location</b>  | <b>Group</b> | <b>Pearson <math>\rho</math></b> | <b>P-value</b> | <b>ICC (95% CI)</b>    |
|------------------|--------------|----------------------------------|----------------|------------------------|
| Central subfield | Normal       | 0.967                            | <0.0001        | 0.967 (0.960 to 0.972) |
|                  | NDR          | 0.965                            | <0.0001        | 0.964 (0.959 to 0.969) |
|                  | DR           | 0.973                            | <0.0001        | 0.972 (0.964 to 0.979) |
| Inner temporal   | Normal       | 0.971                            | <0.0001        | 0.970 (0.965 to 0.975) |
|                  | NDR          | 0.974                            | <0.0001        | 0.973 (0.969 to 0.977) |
|                  | DR           | 0.989                            | <0.0001        | 0.989 (0.986 to 0.992) |
| Inner superior   | Normal       | 0.964                            | <0.0001        | 0.964 (0.957 to 0.969) |
|                  | NDR          | 0.970                            | <0.0001        | 0.969 (0.965 to 0.973) |
|                  | DR           | 0.987                            | <0.0001        | 0.986 (0.982 to 0.990) |
| Inner nasal      | Normal       | 0.949                            | <0.0001        | 0.948 (0.939 to 0.956) |
|                  | NDR          | 0.936                            | <0.0001        | 0.934 (0.925 to 0.943) |
|                  | DR           | 0.976                            | <0.0001        | 0.976 (0.968 to 0.982) |
| Inner inferior   | Normal       | 0.964                            | <0.0001        | 0.963 (0.956 to 0.968) |
|                  | NDR          | 0.940                            | <0.0001        | 0.938 (0.929 to 0.946) |
|                  | DR           | 0.993                            | <0.0001        | 0.992 (0.989 to 0.994) |
| Outer temporal   | Normal       | 0.908                            | <0.0001        | 0.907 (0.891 to 0.922) |
|                  | NDR          | 0.868                            | <0.0001        | 0.866 (0.847 to 0.883) |
|                  | DR           | 0.981                            | <0.0001        | 0.981 (0.975 to 0.985) |
| Outer Superior   | Normal       | 0.959                            | <0.0001        | 0.959 (0.951 to 0.965) |
|                  | NDR          | 0.929                            | <0.0001        | 0.929 (0.918 to 0.938) |
|                  | DR           | 0.956                            | <0.0001        | 0.954 (0.940 to 0.965) |
| Outer nasal      | Normal       | 0.967                            | <0.0001        | 0.967 (0.961 to 0.972) |
|                  | NDR          | 0.950                            | <0.0001        | 0.949 (0.941 to 0.956) |
|                  | DR           | 0.955                            | <0.0001        | 0.954 (0.939 to 0.964) |
| Outer inferior   | Normal       | 0.945                            | <0.0001        | 0.944 (0.934 to 0.953) |

|               |        |       |         |                        |
|---------------|--------|-------|---------|------------------------|
|               | NDR    | 0.950 | <0.0001 | 0.950 (0.943 to 0.957) |
|               | DR     | 0.964 | <0.0001 | 0.964 (0.953 to 0.972) |
| Central point | Normal | 0.922 | <0.0001 | 0.920 (0.906 to 0.932) |
|               | NDR    | 0.917 | <0.0001 | 0.915 (0.902 to 0.926) |
|               | DR     | 0.959 | <0.0001 | 0.958 (0.945 to 0.968) |
| Volume        | Normal | 0.972 | <0.0001 | 0.971 (0.966 to 0.976) |
|               | NDR    | 0.969 | <0.0001 | 0.969 (0.964 to 0.973) |
|               | DR     | 0.983 | <0.0001 | 0.983 (0.978 to 0.987) |

---

Pearson  $\rho$  = Pearson correlation coefficient; ICC = intraclass correlation coefficient.



**Table 4.** Conversion equation evaluation for SD-OCT: predicted values VS actual measurements.

|                  |                                      | NDR N = 741       |                   |        | DR N = 209        |                   |                    |
|------------------|--------------------------------------|-------------------|-------------------|--------|-------------------|-------------------|--------------------|
|                  |                                      | Central subfield  | CPT               | Volume | Central subfield  | CPT               | Volume             |
| SD-OCT Predicted | % of values within 5% of each other  | 98.5%             | 94.0%             | 99.4%  | 95.2%             | 90.0%             | 99.0%              |
| vs.              |                                      |                   |                   |        |                   |                   |                    |
| SD-OCT actual    | % of values within 10% of each other | 99.6%             | 98.4%             | 100%   | 97.6%             | 95.2%             | 99.5%              |
|                  | Difference in means                  | 0.3 $\mu\text{m}$ | 0.3 $\mu\text{m}$ | 0      | 1.8 $\mu\text{m}$ | 2.6 $\mu\text{m}$ | 0.01 $\text{mm}^3$ |

## Figure legends

### Figure 1. Retinal segmentation boundaries for SS-OCT and SD-OCT. (A)

Segmentation boundaries for SS-OCT, the inner segmentation boundary at the upper border of the retinal pigment epithelium (solid green line). (B) Segmentation boundaries for SD-OCT, the inner segmentation boundary at the retinal pigment epithelium-Bruch's membrane complex (solid red line).

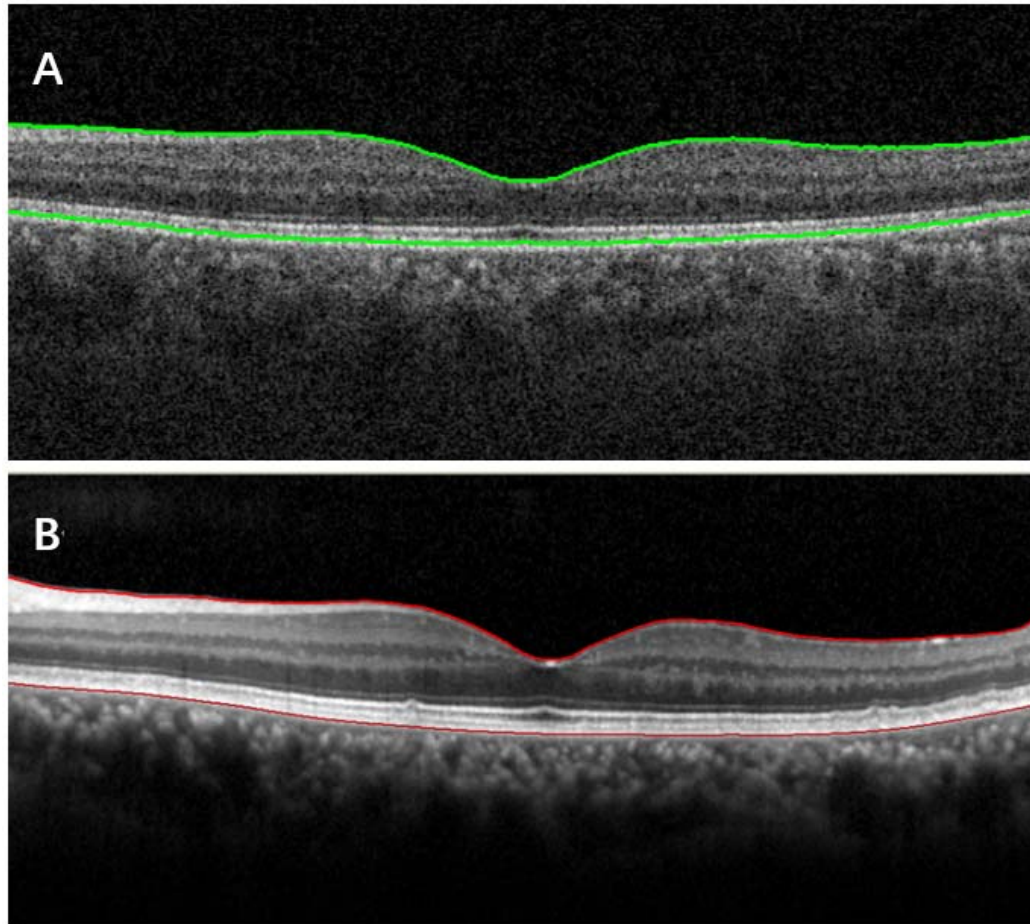

**Figure 2.** Mean macular thickness obtained in the nine ETDRS subfields on SS-OCT and SD-OCT. (A) SS-OCT macular thickness in normal subjects. (B) SD-OCT macular thickness in normal subjects. (C) SS-OCT macular thickness in NDR patients. (D) SD-OCT macular thickness in NDR patients. (E) SS-OCT macular thickness in DR patients. (F) SD-OCT macular thickness in DR patients.



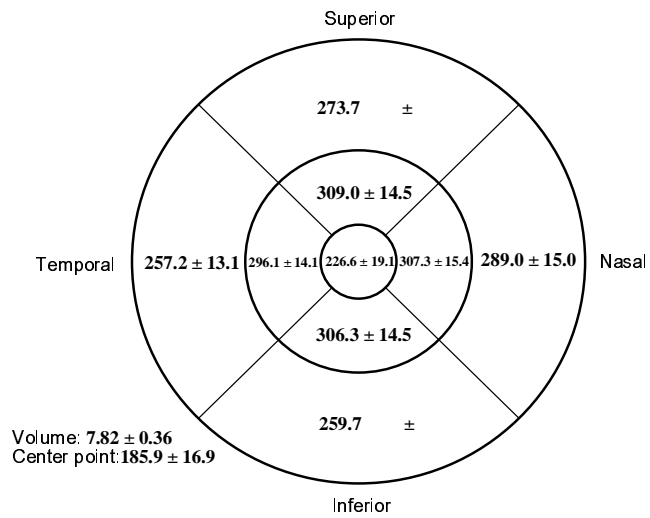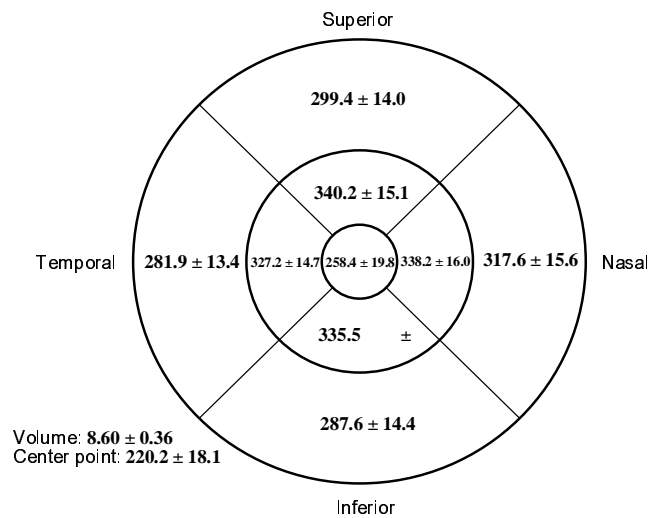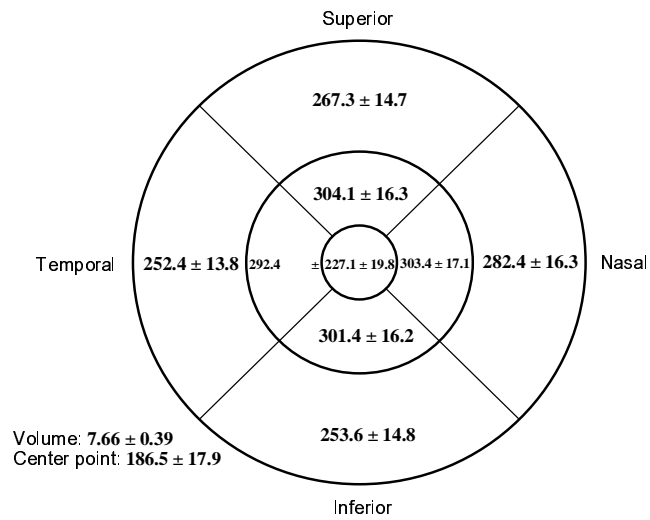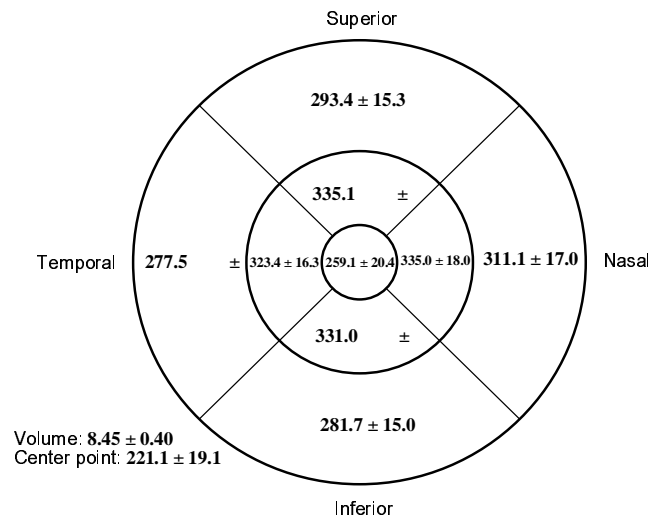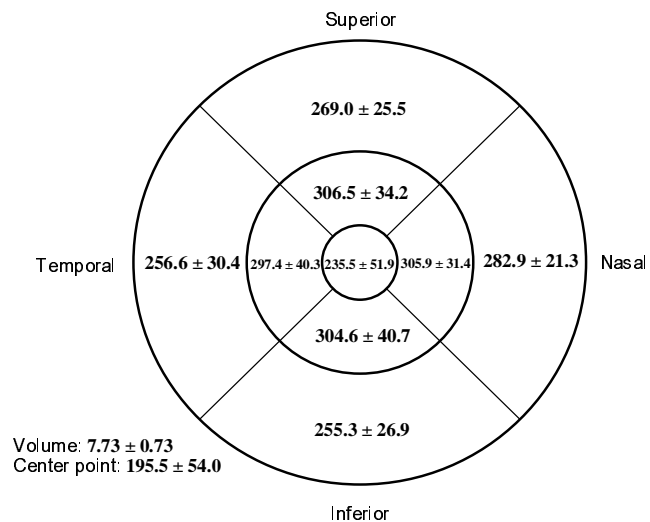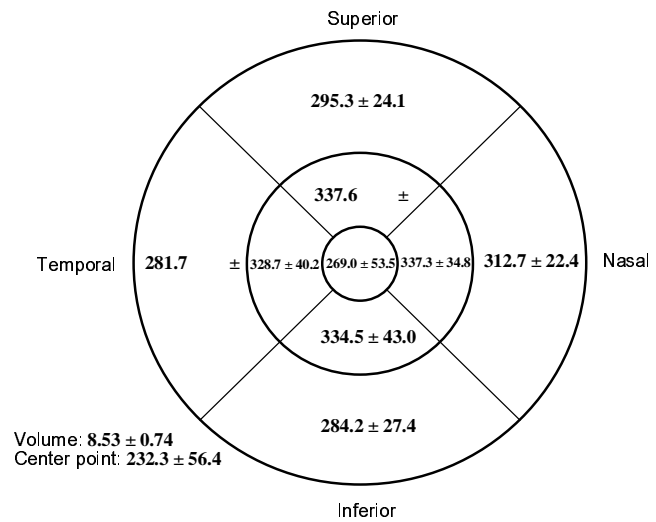

**Figure 3.** Bland-Altman plots of CSF, CPT and macular volume between SS-OCT and SD-OCT for normal subjects, NDR and DR patients. (A) CSF thickness in normal subjects. (B) CPT in normal subjects. (C) macular volume in normal subjects. (D) CSF thickness in NDR patients. (E) CPT in NDR patients. (F) macular volume in NDR patients. (G) CSF thickness in DR patients. (H) CPT in DR patients. (I) macular volume in DR patients.

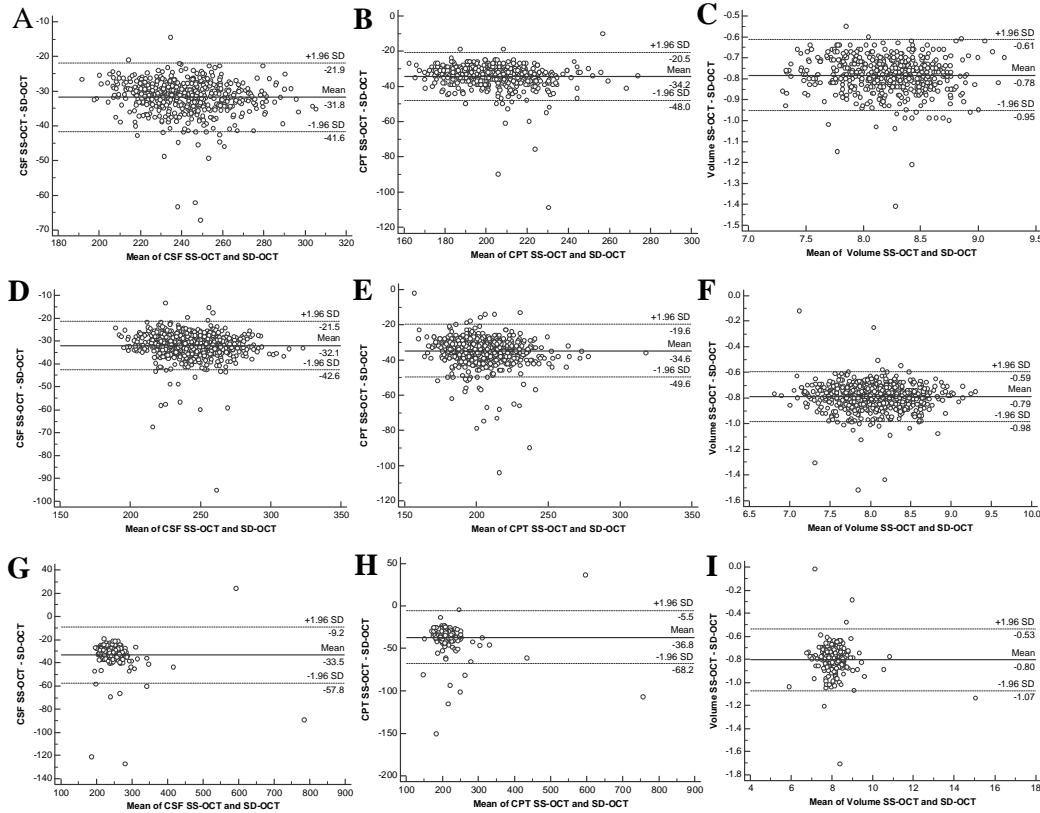

**Figure 4.** Bland-Altman plots showing the agreement between the predicted SD-OCT values in the CSF, CPT and macular volume and actual SD-OCT measurements. (A) CSF thickness in NDR patients. (B) CPT in NDR patients. (C) macular volume in DR patients. (D) CSF thickness in DR patients. (E) CPT in DR patients. (F) macular volume in NDR patients.

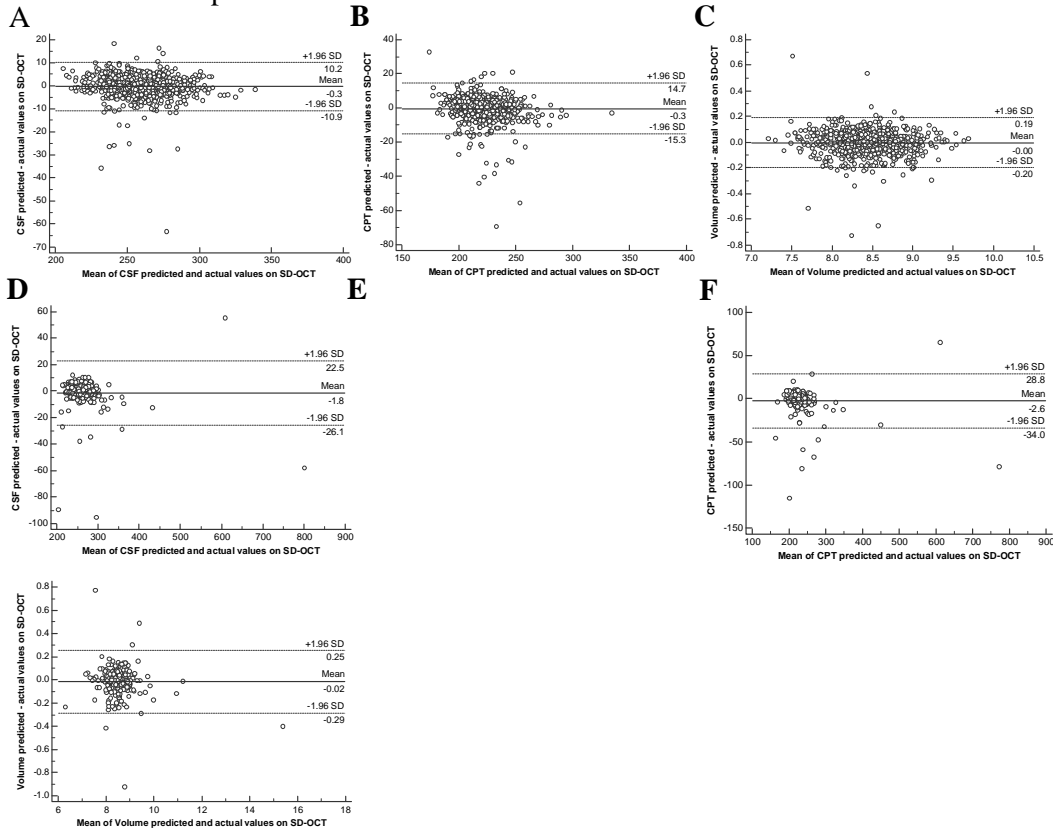

Source: https://medrxiv.org/content/medrxiv/early/2020/11/23/2020.11.22.20236307.full.pdf
